# Supplementary material for: The Small RNA-Binding Protein CcaF1 Promotes Formation of Photosynthetic Complexes in Rhodobacter sphaeroides
Source: MDPI journal article supplement (doi:10.3390/ijms24119515), 2023-05-30
Supplement: s1 [file s1]

## Supplementary Information

**Table S1.** Bacterial strains and plasmids.

| Strain or plasmid                    | Description                                                                       | Reference           |
|--------------------------------------|-----------------------------------------------------------------------------------|---------------------|
| <b><i>E. coli</i> strains</b>        |                                                                                   |                     |
| JM109                                | Cloning strain                                                                    | New England Biolabs |
| S17-1                                | Donor strain for diparental conjugation                                           | (1)                 |
| <b><i>R. sphaeroides</i> strains</b> |                                                                                   |                     |
| 2.4.1                                | Wild type                                                                         | (2)                 |
| <b>Plasmids</b>                      |                                                                                   |                     |
| pJET1.2/blunt cloning vector         | Ap <sup>r</sup> , 2.97 kb                                                         | Fermentas           |
| pRK4352                              | Empty vector control; Tc <sup>r</sup>                                             | (3)                 |
| pRK <i>ccaF1</i>                     | Constitutive overexpression of CcaF1 (RSP_6037); Tc <sup>r</sup>                  | (4)                 |
| pRK <i>ccaF1</i> _3xFLAGnt           | Overexpression of CcaF1 (RSP_6037) with an N-terminal 3xFLAG-Tag; Tc <sup>r</sup> | (4)                 |

**Table S2.** Oligodeoxynucleotide sequences.

| Name          | Sequence 5'-3'         | Reference  |
|---------------|------------------------|------------|
| <b>RT-PCR</b> |                        |            |
| CcaF1_f       | GTCTGGGAGACCGTGTTCG    | This study |
| CcaF1_r       | CCGTAGGCGGCTTCCATC     | This study |
| pufBA_f       | ATCACCGCAGGAGGACAG     | (5)        |
| pufBA_r       | ACATCTGGCGTCCGTGGTTC   | (5)        |
| pufL_f        | ACACCTACGGCAACTTCC     | This study |
| pufL_r        | ATCGAGTAGCCGACCAGA     | This study |
| pucBA_f       | CGAAGCCGAACAAGTTCA     | (4)        |
| pucBA_r       | TTCACCACGAGCCAGATT     | (4)        |
| bchE_f        | CGCGATCAGGTCGAGGTCTTC  | This study |
| bchE_r        | CCAAGTCGTAGAAGGTTGCCCC | This study |
| bchB_f        | GCTGCTCTACCCGAGACC     | This study |
| bchB_r        | CGAACAGGAACACGCGCTTG   | This study |
| bchN_f        | TCGAGGAGAAGGATCTCG     | This study |
| bchN_r        | GAGCCGGAGAAGTTGTAGAC   | This study |
| bchL_f        | CGATCAGGCGGTGGTGGT     | This study |
| bchL_r        | CGTCGAGGTCCGGCATGT     | This study |
| bchM_f        | GAGGGTCGCGACACGATGC    | This study |
| bchM_r        | GAAGGTCACGCGGTCCTGATG  | This study |
| appA_f        | ACGCTTGTTTCAGGGGCT     | This study |
| appA_r        | CGCGCAGCGTCAGATCC      | This study |
| fnrL_f        | CCGTGGCCTATGACGTGACC   | (6)        |
| fnrL_r        | GCAGGCTCGCGATCTTCTCG   | (6)        |
| ppaA_f        | TTTGACGCCATAATGATTTTC  | This study |
| ppaA_r        | GTCGTTTCGTCACGATGTC    | This study |
| ppsR_f        | GAGCCGGAGAAGTTGTAGAC   | This study |
| ppsR_r        | CATAAAGGGCGAAGGTGT     | This study |
| rpoZ_f        | ATCGCGGAAGAGACCCAGAG   | (5)        |
| rpoZ_r        | GAGCAGCGCCATCTGATCCT   | (5)        |
| PcrZ_f        | GGAGTGGTAACGAGTATCCGGC | (4)        |
| PcrZ_r        | GACCACGCGTATCGAGTCGA   | (4)        |
| bchH_f        | ATCCCTCCATCGTGAAGCTCAC | (4)        |
| bchH_r        | TAGCGGACCATCTGCTCGAGGT | (4)        |

| Northern Blot |                         |            |
|---------------|-------------------------|------------|
| p-CcsR1       | CGTCGCCGCTGCTGCTACAGGTC | (7)        |
| p-pufBA_f     | ACATCTGGCGTCCGTGGTTC    | This study |
| p-pufBA_r     | ATCACCGCGAGGAGGAACAG    | This study |
| p-pucBA_f     | GCCGAAGAAGTTCATAAGCAA   | This study |
| p-pucBA_r     | CAGCCGAGCCTTGGTAGTAG    | This study |
| p5S           | CTTGAGACGCAGTACCATTG    | (8)        |
| p14S          | CTTAGATGTTTCAGTTCCC     | (9)        |

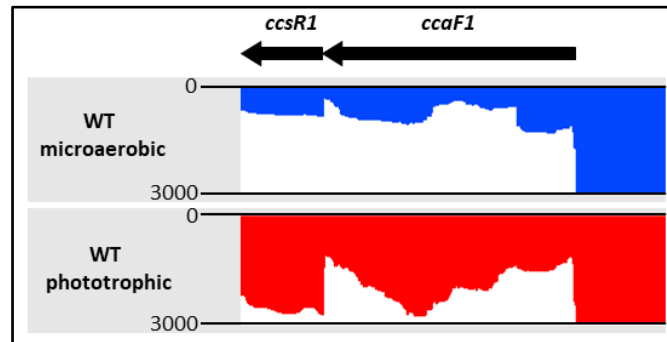

**Figure S1.** Read coverage of the *ccaF1* mRNA in the *R. sphaeroides* wild type under microaerobic and phototrophic conditions. The screenshot was taken from the Integrated Genome Browser and displays the total read coverage from RNA-seq data obtained from microaerobically (blue) and phototrophically (red) grown wild type of *R. sphaeroides* in exponential growth phase. The merged read coverage of biological triplicates is shown. The read count scale is given as numbers (0-3000).

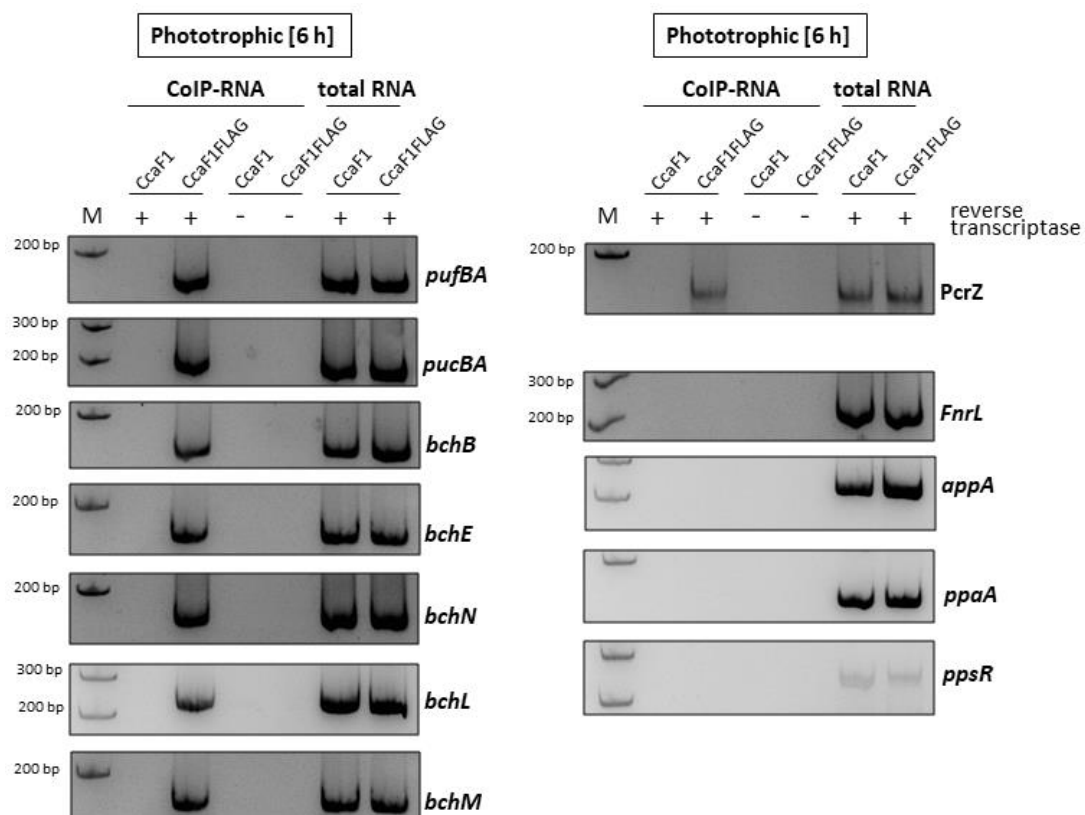

**Figure S2.** Validation of co-immunoprecipitated RNAs by real-time RT-PCR. The specific non-coding RNAs and mRNA transcripts of the coimmunoprecipitation were analyzed by real-time RT-PCR. The RT-PCR amplicons were separated on a 10% polyacrylamide gel and visualized by ethidium-bromide staining.

## References

1. Simon, R.; O'Connell, M.; Labes, M.; Puhler, A. Plasmid vectors for the genetic analysis and manipulation of rhizobia and other gram-negative bacteria. *Meth. Enzymol.* **1986**, *118*, 640-659, doi:10.1016/0076-6879(86)18106-7.
2. van Niel, C.B. The culture, general physiology, morphology, and classification of the non-sulfur purple and brown bacteria. *Bacteriol. Rev.* **1944**, *8*, 1-118, doi:10.1128/br.8.1.1-118.1944.
3. Mank, N.N.; Berghoff, B.A.; Hermanns, Y.N.; Klug, G. Regulation of bacterial photosynthesis genes by the small noncoding RNA PcrZ. *Proc. Natl. Acad. Sci. U. S. A.* **2012**, *109*, 16306–16311, doi:10.1073/pnas.1207067109.
4. Grützner, J.; Billenkamp, F.; Spanka, D.T.; Rick, T.; Monzon, V.; Förstner, K.U.; Klug, G. The small DUF1127 protein CcaF1 from *Rhodobacter sphaeroides* is an RNA-binding protein involved in sRNA maturation and RNA turnover. *Nucleic Acids Res.* **2021**, *49*, 3003–3019, doi:10.1093/nar/gkab146.
5. Jäger, A.; Braatsch, S.; Haberzettl, K.; Metz, S.; Osterloh, L.; Han, Y.; Klug, G. The AppA and PpsR proteins from *Rhodobacter sphaeroides* can establish a redox-dependent signal chain but fail to transmit blue-light signals in other bacteria. *J. Bacteriol.* **2007**, *189*, 2274-2282, doi:10.1128/JB.01699-06.
6. Börner, J.; Friedrich, T.; Bartkuhn, M.; Klug, G. Ribonuclease E strongly impacts bacterial adaptation to different growth conditions. *RNA Biol.* **2023**, *20*, 120–135, doi:10.1080/15476286.2023.2195733.
7. Billenkamp, F.; Peng, T.; Berghoff, B.A.; Klug, G. A cluster of four homologous small RNAs modulates C1 metabolism and the pyruvate dehydrogenase complex in *Rhodobacter sphaeroides* under various stress conditions. *J. Bacteriol.* **2015**, *197*, 1839–1852, doi:10.1128/JB.02475-14.
8. Berghoff, B.A.; Glaeser, J.; Sharma, C.M.; Vogel, J.; Klug, G. Photooxidative stress-induced and abundant small RNAs in *Rhodobacter sphaeroides*. *Mol. Microbiol.* **2009**, *74*, 1497–1512, doi:10.1111/j.1365-2958.2009.06949.x.
9. Braatsch, S.; Gomelsky, M.; Kuphal, S.; Klug, G. A single flavoprotein, AppA, integrates both redox and light signals in *Rhodobacter sphaeroides*. *Mol. Microbiol.* **2002**, *45*, 827–836, doi:10.1046/j.1365-2958.2002.03058.x.
